# Supplementary material
Source: MDPI journal article supplement (https://www.mdpi.com/2305-6320/8/7/33)
Supplement: s1 [file s1]

# Supplementary Materials: Re-Evaluation of Chemotherapeutic Potential of Pyoktanin Blue

Hiroshi Sakagami <sup>1,\*</sup>, Toshiko Furukawa <sup>2</sup>, Keitaro Satoh <sup>3</sup>, Shigeru Amano <sup>1</sup>, Yosuke Iijima <sup>4</sup>, Takuro Koshikawa <sup>5</sup>, Daisuke Asai <sup>5,6</sup>, Kunihiro Fukuchi <sup>7</sup>, Hiromu Takemura <sup>5</sup>, Taisei Kanamoto <sup>6</sup> and Satoshi Yokose <sup>2</sup>

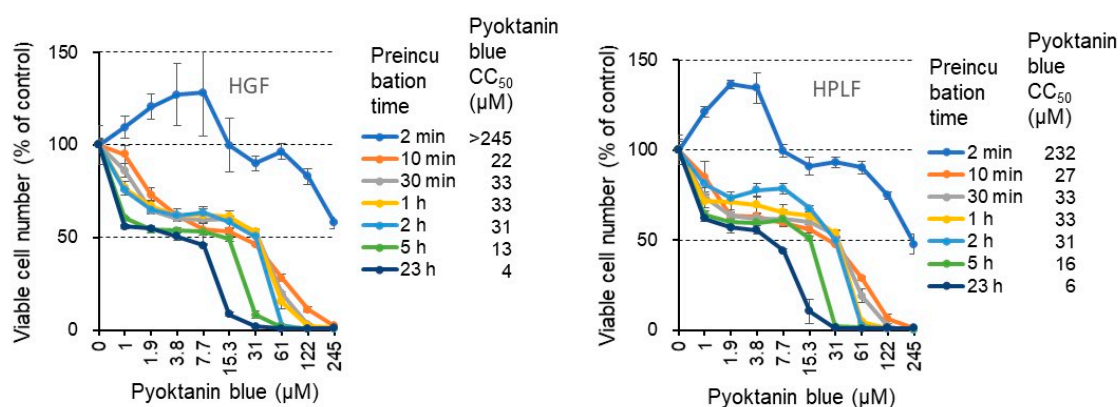

**Figure S1.** Rapid cytotoxic action of PB. HGF and HPLF cells were pre-incubated for the indicated time in DMEM + 10%FBS, and the incubated in the fresh medium for a total of 48 h. The viable cells were then determined by MTT method. Each value represented as mean  $\pm$  S.D. of triplicate determination. HGF: Human gingival fibroblast. HPLF: Human periodontal ligament fibroblast.
